# Supplementary material for: Concept Maps for Improved Science Reasoning and Writing: Complexity Isn’t Everything
Source: Atypon-hosted journal article supplement (doi:10.1187/cbe.15-06-0138), 2015-11-04
Supplement: combinedsupmats.pdf [file combinedsupmats.pdf]

# Supplemental Material

*CBE—Life Sciences Education*

Dowd *et al.*

## Supplemental Tables

TABLE A: Correlations between structural features of concept maps and BioTAP ( $n = 49$ ;  $p$ -values in parentheses).

|                           |              | Q1           | Q2           | Q3           | Q4           | Q5           | Q6           | Q7           | Q8           | Q9           | Q1 – Q5      | Q6 – Q9      |
|---------------------------|--------------|--------------|--------------|--------------|--------------|--------------|--------------|--------------|--------------|--------------|--------------|--------------|
| Draft                     | Concepts     | -0.12 (0.40) | 0.08 (0.61)  | -0.12 (0.40) | -0.05 (0.74) | -0.11 (0.46) | -0.20 (0.16) | -0.13 (0.36) | -0.11 (0.44) | 0.11 (0.46)  | -0.13 (0.38) | -0.15 (0.29) |
|                           | Propositions | 0.04 (0.77)  | 0.09 (0.54)  | -0.12 (0.41) | -0.07 (0.63) | -0.18 (0.22) | -0.16 (0.26) | -0.08 (0.58) | -0.04 (0.79) | 0.11 (0.47)  | -0.08 (0.57) | -0.07 (0.65) |
|                           | Branches     | 0.20 (0.17)  | 0.16 (0.26)  | -0.21 (0.14) | -0.08 (0.59) | -0.11 (0.46) | -0.15 (0.30) | 0.04 (0.78)  | -0.01 (0.92) | 0.07 (0.61)  | 0.02 (0.92)  | -0.02 (0.88) |
| Revision                  | Concepts     | -0.06 (0.66) | 0.00 (0.99)  | 0.03 (0.84)  | -0.05 (0.75) | -0.09 (0.56) | -0.07 (0.66) | -0.14 (0.35) | -0.22 (0.12) | 0.26 (0.07)  | -0.08 (0.60) | -0.13 (0.39) |
|                           | Propositions | 0.09 (0.52)  | -0.06 (0.70) | -0.07 (0.65) | -0.11 (0.46) | -0.10 (0.50) | 0.01 (0.92)  | -0.12 (0.43) | -0.22 (0.13) | 0.27 (0.06)  | -0.08 (0.59) | -0.08 (0.58) |
|                           | Branches     | 0.05 (0.74)  | -0.09 (0.55) | -0.14 (0.34) | -0.15 (0.31) | -0.07 (0.63) | -0.08 (0.57) | -0.11 (0.44) | -0.12 (0.40) | 0.25 (0.08)  | -0.14 (0.35) | -0.05 (0.74) |
| Final                     | Concepts     | -0.06 (0.66) | 0.01 (0.93)  | -0.01 (0.93) | -0.05 (0.72) | -0.02 (0.91) | -0.17 (0.25) | -0.07 (0.63) | -0.04 (0.79) | -0.03 (0.82) | -0.06 (0.69) | -0.13 (0.39) |
|                           | Propositions | 0.09 (0.56)  | 0.01 (0.96)  | -0.11 (0.46) | -0.09 (0.54) | -0.01 (0.95) | -0.14 (0.33) | -0.05 (0.72) | -0.04 (0.76) | -0.01 (0.96) | -0.03 (0.84) | -0.10 (0.48) |
|                           | Branches     | 0.31 (0.03)  | 0.01 (0.95)  | -0.23 (0.11) | -0.17 (0.23) | 0.02 (0.90)  | -0.19 (0.19) | -0.07 (0.63) | -0.02 (0.91) | 0.03 (0.85)  | 0.02 (0.90)  | -0.09 (0.54) |
| $\Delta(D \text{ to } R)$ | Concepts     | 0.08 (0.59)  | -0.11 (0.46) | 0.22 (0.12)  | 0.00 (1.00)  | 0.03 (0.84)  | 0.20 (0.17)  | -0.01 (0.95) | -0.18 (0.23) | 0.23 (0.10)  | 0.07 (0.63)  | 0.03 (0.81)  |
|                           | Propositions | 0.06 (0.70)  | -0.16 (0.27) | 0.06 (0.70)  | -0.04 (0.77) | 0.08 (0.56)  | 0.19 (0.18)  | -0.04 (0.79) | -0.20 (0.17) | 0.19 (0.20)  | 0.00 (0.99)  | -0.02 (0.92) |
|                           | Branches     | -0.13 (0.37) | -0.23 (0.10) | 0.05 (0.72)  | -0.08 (0.58) | 0.03 (0.86)  | 0.05 (0.73)  | -0.15 (0.30) | -0.11 (0.45) | 0.19 (0.20)  | -0.15 (0.30) | -0.03 (0.84) |
| $\Delta(R \text{ to } F)$ | Concepts     | -0.02 (0.89) | 0.02 (0.91)  | -0.05 (0.74) | -0.02 (0.87) | 0.07 (0.64)  | -0.17 (0.25) | 0.05 (0.75)  | 0.19 (0.20)  | -0.32 (0.02) | 0.00 (1.00)  | -0.04 (0.76) |
|                           | Propositions | 0.02 (0.90)  | 0.06 (0.67)  | -0.07 (0.61) | -0.01 (0.93) | 0.08 (0.57)  | -0.19 (0.18) | 0.04 (0.77)  | 0.15 (0.29)  | -0.27 (0.06) | 0.04 (0.79)  | -0.06 (0.70) |
|                           | Branches     | 0.33 (0.02)  | 0.09 (0.54)  | -0.16 (0.28) | -0.08 (0.61) | 0.08 (0.57)  | -0.15 (0.29) | 0.02 (0.91)  | 0.09 (0.55)  | -0.19 (0.19) | 0.15 (0.32)  | -0.06 (0.66) |
| $\Delta(D \text{ to } F)$ | Concepts     | 0.03 (0.83)  | -0.05 (0.72) | 0.10 (0.51)  | -0.02 (0.89) | 0.08 (0.59)  | -0.02 (0.87) | 0.04 (0.81)  | 0.06 (0.71)  | -0.14 (0.33) | 0.05 (0.76)  | -0.02 (0.90) |
|                           | Propositions | 0.06 (0.67)  | -0.07 (0.63) | -0.02 (0.88) | -0.05 (0.76) | 0.14 (0.32)  | -0.02 (0.87) | 0.01 (0.96)  | -0.02 (0.90) | -0.10 (0.50) | 0.04 (0.80)  | -0.06 (0.66) |
|                           | Branches     | 0.20 (0.17)  | -0.11 (0.46) | -0.10 (0.49) | -0.13 (0.36) | 0.10 (0.50)  | -0.10 (0.49) | -0.11 (0.47) | -0.01 (0.96) | -0.02 (0.87) | 0.01 (0.94)  | -0.08 (0.57) |

TABLE B: Average BioTAP scores of students who simplify concept maps and those who do not (s.d. in parentheses).

| BioTAP  | Simplified<br>( <i>n</i> = 24) | Not simplified<br>( <i>n</i> = 25) | <i>p</i> -value |
|---------|--------------------------------|------------------------------------|-----------------|
| Q1      | 4.29 (0.81)                    | 4.24 (0.97)                        | 0.84            |
| Q2      | 4.63 (0.58)                    | 4.44 (0.71)                        | 0.32            |
| Q3      | 4.80 (0.51)                    | 4.80 (0.50)                        | 0.95            |
| Q4      | 4.75 (0.53)                    | 4.36 (0.99)                        | 0.10            |
| Q5      | 4.46 (0.72)                    | 4.36 (0.81)                        | 0.66            |
| Q6      | 4.42 (0.93)                    | 4.52 (0.71)                        | 0.66            |
| Q7      | 4.79 (0.41)                    | 4.56 (0.77)                        | 0.20            |
| Q8      | 3.50 (1.79)                    | 3.36 (1.80)                        | 0.79            |
| Q9      | 3.67 (1.13)                    | 3.84 (0.85)                        | 0.55            |
| Q1 – Q5 | 22.92 (1.64)                   | 22.20 (2.06)                       | 0.19            |
| Q6 – Q9 | 16.38 (2.22)                   | 16.28 (2.34)                       | 0.88            |
| Q1 – Q9 | 39.29 (2.77)                   | 38.48 (3.69)                       | 0.39            |
